# Supplementary material for: Mechanisms induced by transition metal contaminants and their effect on the hydrothermal stability of zirconia-containing bioceramics: an XPS study
Source: Royal Society of Chemistry journal article supplement (doi:10.1039/c8cp06027d), 2018-01-01
Supplement: c8cp06027d1.pdf [file c8cp06027d1.pdf]

## **Mechanisms induced by transition metal contaminants and their effect on the hydrothermal stability of zirconia-containing bioceramics: an XPS study**

Wenliang Zhu<sup>1,\*</sup>, Aiko Fujiwara<sup>1</sup>, Naomichi Nishiike<sup>1</sup>, Shizuka Nakashima<sup>1</sup>, Hui Gu<sup>2</sup>, Elia Marin<sup>1,3</sup>, Nobuhiko Sugano<sup>4</sup>, and Giuseppe Pezzotti<sup>1,5,6,7\*</sup>

<sup>1</sup>*Ceramic Physics Laboratory, Kyoto Institute of Technology, Sakyo-ku, Matsugasaki, 606-8585 Kyoto, Japan*

<sup>2</sup>*Department of Materials Science and Engineering, Shanghai University, Shanghai, P.R. China*

<sup>3</sup>*Department of Dental Medicine, Graduate School of Medical Science, Kyoto Prefectural University of Medicine, Kamigyo-ku, 602-8566 Kyoto, Japan*

<sup>4</sup>*Department of Medical Engineering for Treatment of Bone and Joint Disorders, Osaka University, 2-2 Yamadaoka, Suita, 565-0854 Osaka, Japan*

<sup>5</sup>*Department of Orthopaedic Surgery, Tokyo Medical University, 6-7-1, Nishi-Shinjuku, Shinjuku-ku, 160-0023 Tokyo, Japan*

<sup>6</sup>*The Center for Advanced Medical Engineering and Informatics, Osaka University, Yamadaoka, Suita, 565-0871 Osaka, Japan*

<sup>7</sup>*Department of Immunology, Graduate School of Medical Science, Kyoto Prefectural University of Medicine Kamigyo-ku, 465 Kajii-cho, Kawaramachi dori 602-0841 Kyoto, Japan*

\* Corresponding authors; E-mail: [wlzhu@kit.ac.jp](mailto:wlzhu@kit.ac.jp) (W. Z.); [pezzotti@kit.ac.jp](mailto:pezzotti@kit.ac.jp) (G. P.).

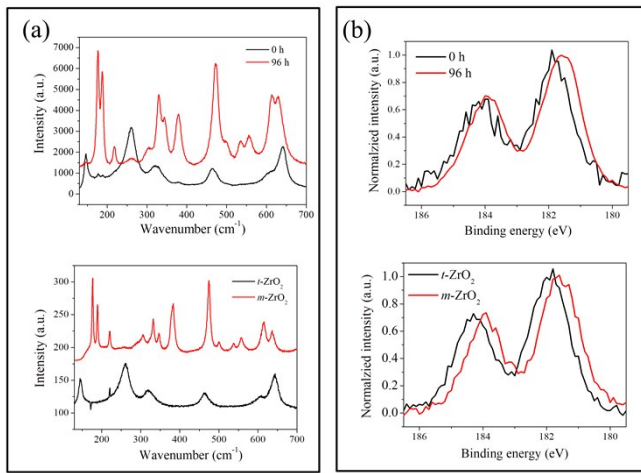

**Figure S1:** Comparisons of (a) Raman and (b) Zr3d XP spectra between the current 3Y-TZP samples with and without hydrothermal treatment at 132 °C for 96 h and the non-transformed and fully transformed ones fabricated by a different procedure.

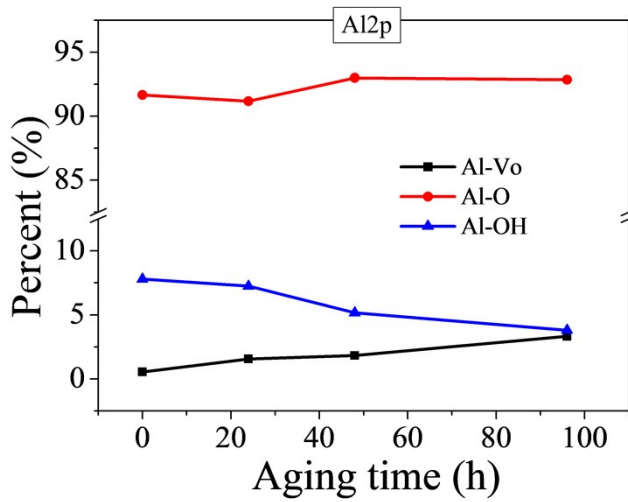

**Figure S2:** Variation of area percent of three sub-bands of the Al2p XP peak for monolithic alumina samples with aging time.

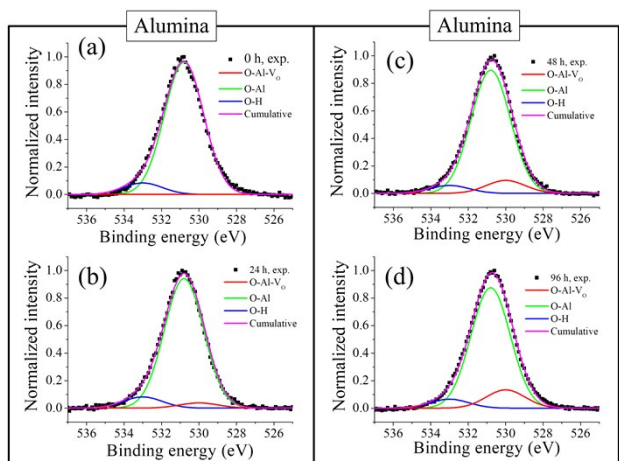

**Figure S3:** O1s XP spectra of monolithic alumina samples subjected to autoclaving for (a) 0 h, (b) 24 h, (c) 48 h, and (d) 96 h.

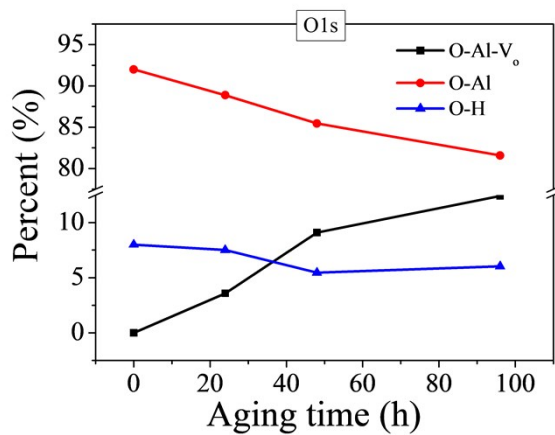

**Figure S4:** Variation of area percent of three sub-bands of the O1s XP peak for monolithic alumina samples with aging time.
